# Supplementary material
Source: publisher site journal article supplement (https://www.dovepress.com/article/602067)
Supplement: Supplementary file 1 [file 602067%20Supplementary.docx]

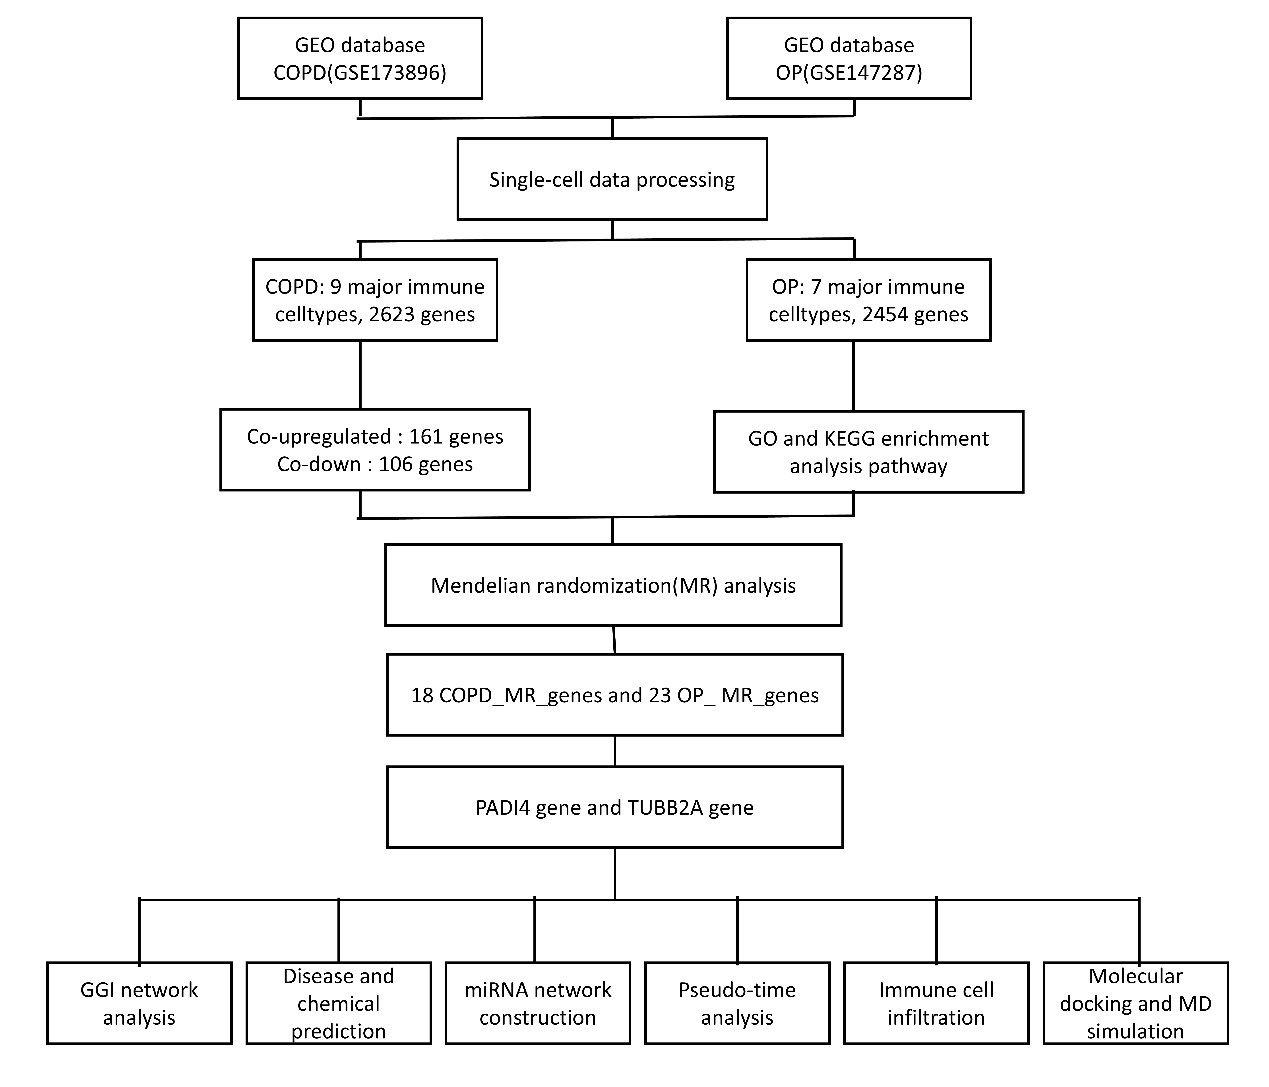


**Figure S1.** Research flowchart.

**Abbreviations:** MD, molecular dynamics.


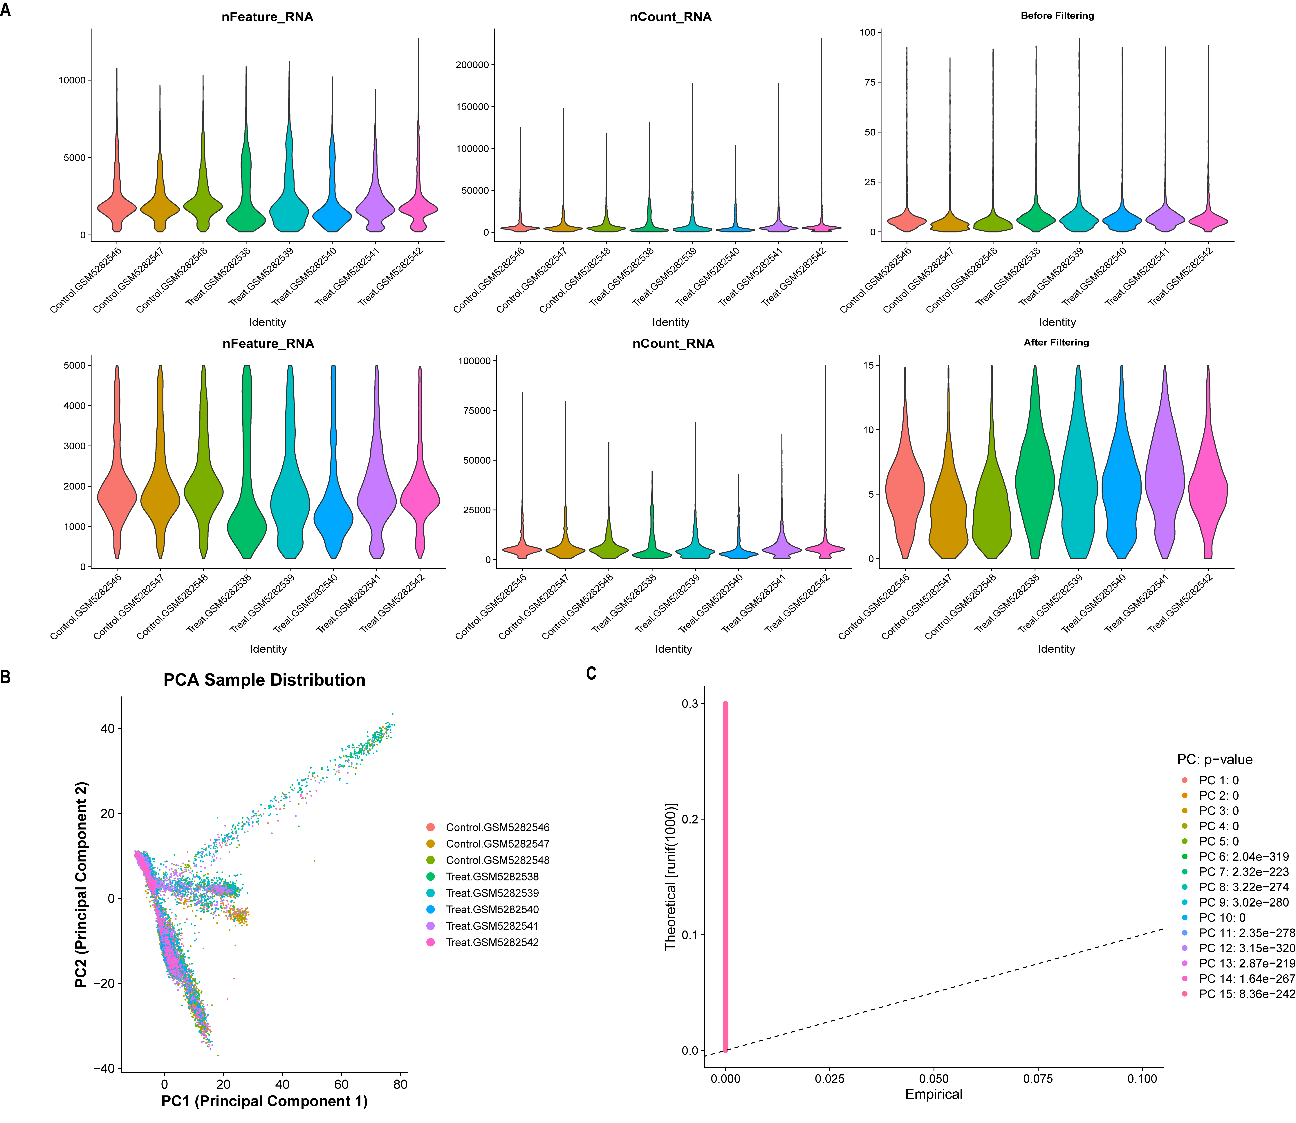


**Figure S2.** Analysis of single-cell data for COPD. (A) Analysis of QC single-cell data of COPD. (B) Distribution of all samples in the single-cell data of COPD. (C) Selection of optional dimensions for COPD.


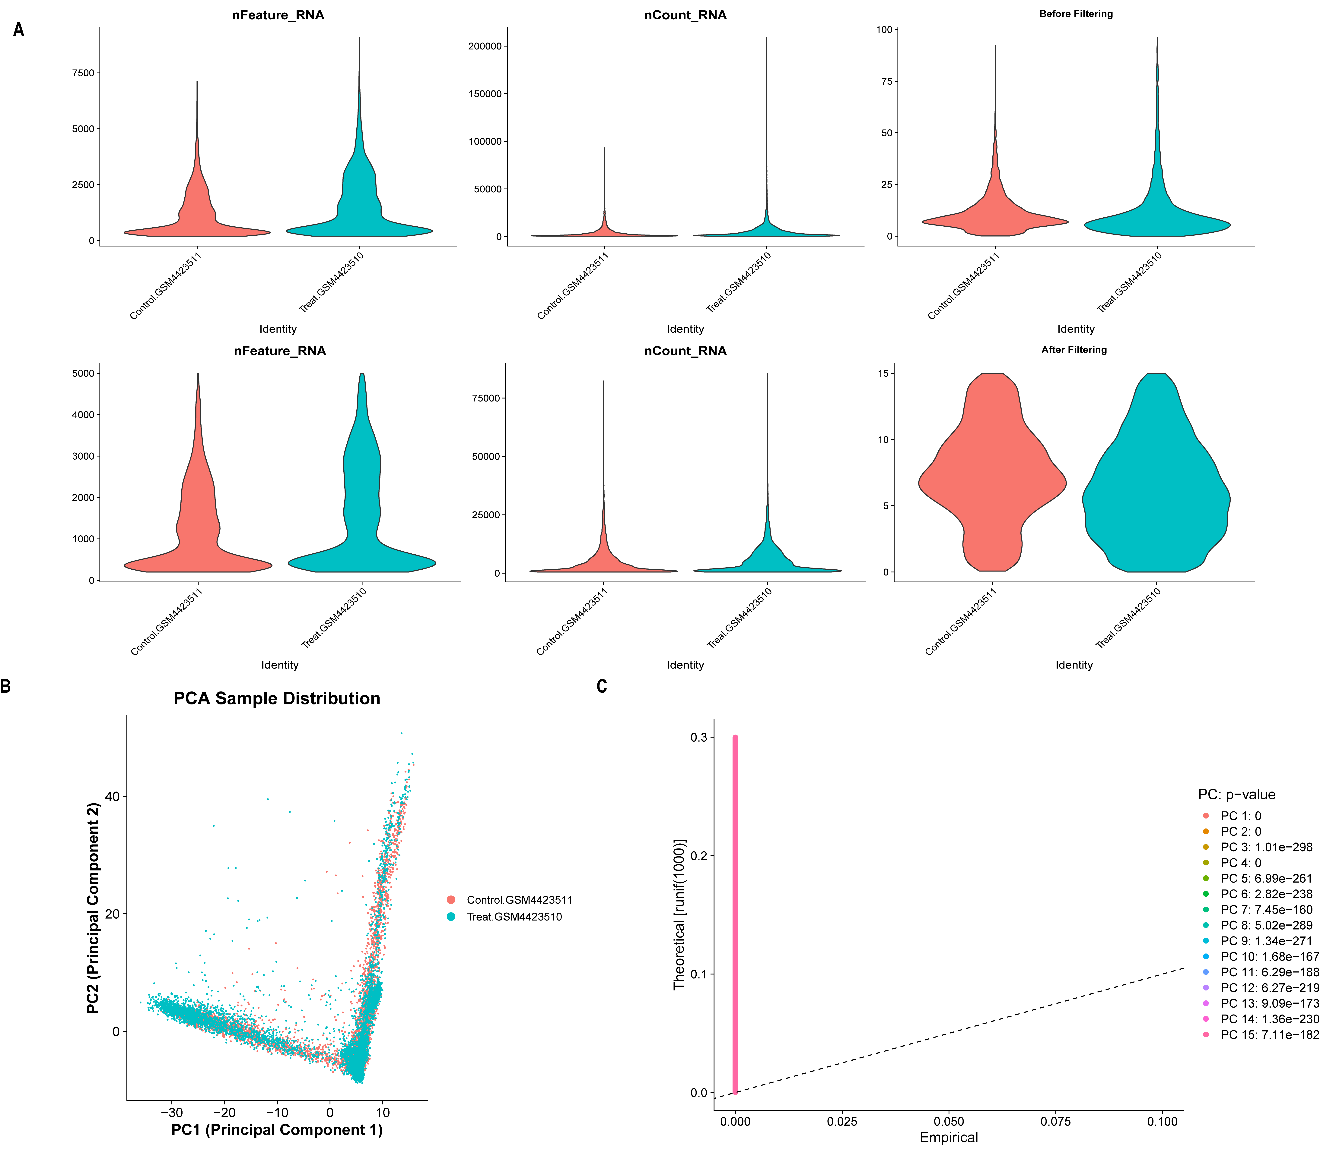


**Figure S3.** Analysis of single-cell data for OP. (A) Analysis of QC single-cell data of OP. (B) Distribution of all samples in the single-cell data of OP. (C) Selection of optional dimensions for OP.


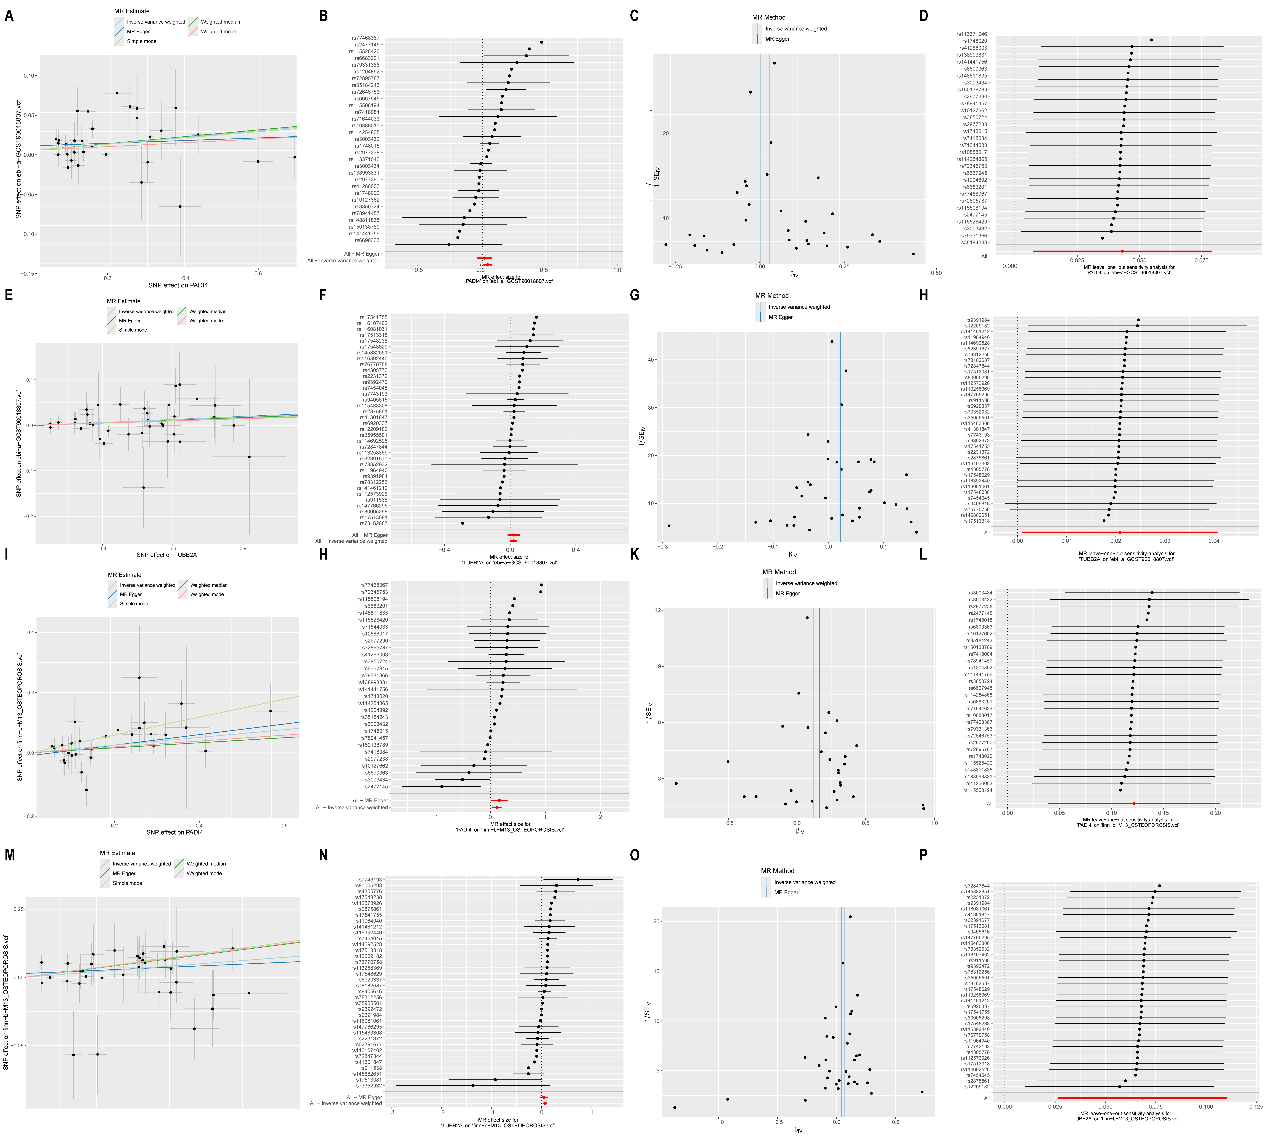


**Figure S4.** MR analysis confirmed that PADI4 and TUBB2A have causal effects on COPD and OP. (A) Scatterplot of MR analysis of PADI4 in COPD. (B) Forest plot of MR analysis of PADI4 in COPD. (C) Funnel plot of MR analysis of PADI4 in COPD. (D) Leave-one-out analysis of MR analysis of PADI4 in COPD. (E) Scatterplot of homologous analysis of TUBB2A in COPD. (F) Forest plot of homologous analysis of TUBB2A in COPD. (G) Funnel plot of homologous analysis of TUBB2A in COPD. (H) Leave-one-out analysis of homologous analysis of TUBB2A in COPD. (I) Scatterplot of homologous analysis of PADI4 in OP. (J) Forest plot of homologous analysis of PADI4 in OP. (K) Funnel plot of homologous analysis of PADI4 in OP. (L) Leave-one-out analysis of homologous analysis of PADI4 in OP. (M) Scatterplot of homologous analysis of TUBB2A in OP. (N)Forest plot of homologous analysis of TUBB2A in OP. (O) Funnel plot of homologous analysis of TUBB2A in OP. (P) Leave-one-out analysis of homologous analysis of TUBB2A in OP.


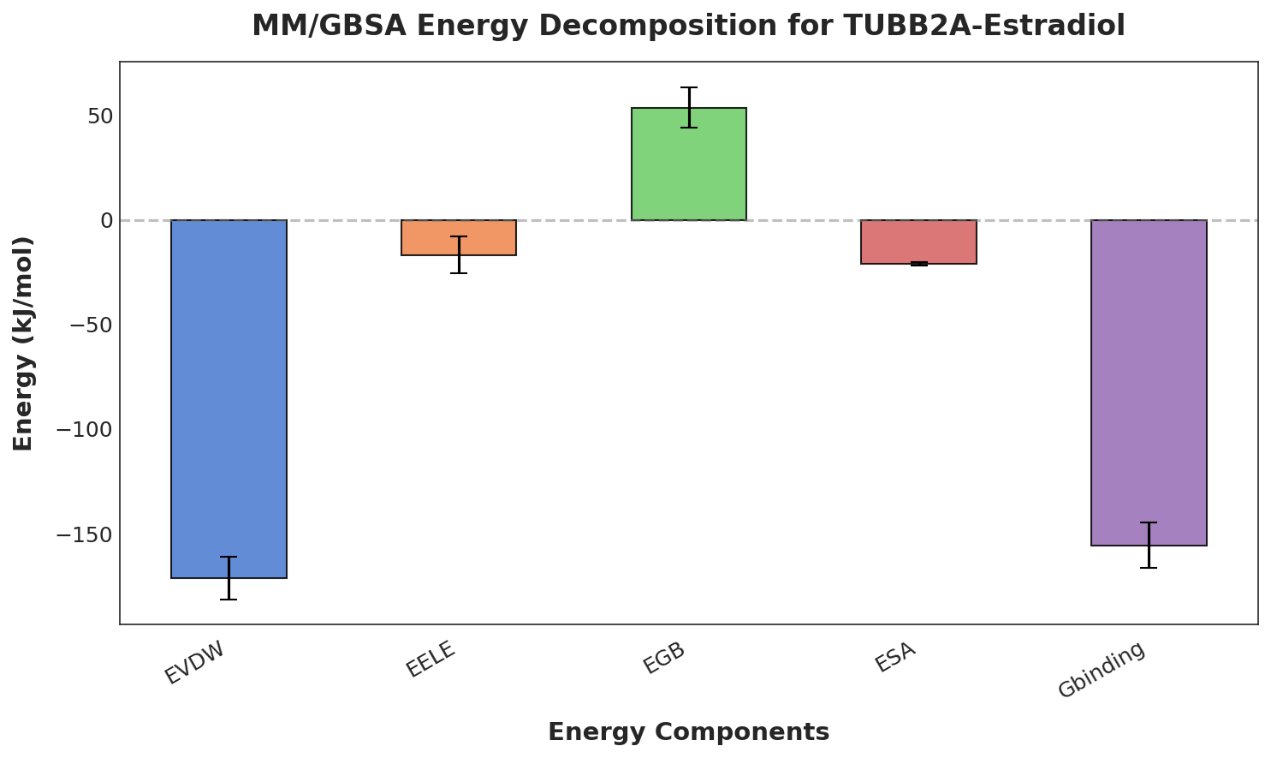


**Figure S5.** MM/GBSA energy decomposition for TUBB2A-estradiol

**Abbreviations:** MM/GBSA, molecular mechanics/generalized born surface area; E_VDW, van der waals energy; E_ELE, electrostatic energy; E_GB, polar solvation contribution; E_SA, nonpolar solvation contribution; Gbinding, total binding free energy.

**Table S1.** The top 10 biological process terms according to z-scores

| **ID** | **Description** |
| --- | --- |
| GO:0009612 | response to mechanical stimulus |
| GO:0006935 | chemotaxis |
| GO:0042330 | taxis |
| GO:0045444 | fat cell differentiation |
| GO:0007584 | response to nutrient |
| GO:0030099 | myeloid cell differentiation |
| GO:0045765 | regulation of angiogenesis |
| GO:1901342 | regulation of vasculature development |
| GO:0001649 | osteoblast differentiation |
| GO:0061138 | morphogenesis of a branching epithelium |

**Notes:** z-scores, standardized scores that indicate the deviation of a data point from the mean of a distribution.

**Table S2.** The top 10 cellular component terms according to z-scores

| **ID** | **Description** |
| --- | --- |
| GO:0031012 | extracellular matrix |
| GO:0030312 | external encapsulating structure |
| GO:0060205 | cytoplasmic vesicle lumen |
| GO:0031983 | vesicle lumen |
| GO:0034774 | secretory granule lumen |
| GO:0031091 | platelet alpha granule |
| GO:0005788 | endoplasmic reticulum lumen |
| GO:0034358 | plasma lipoprotein particle |
| GO:1990777 | lipoprotein particle |
| GO:0032994 | protein–lipid complex |

**Notes:** z-scores, standardized scores that indicate the deviation of a data point from the mean of a distribution.

**Table S3.** The top 10 molecular function terms according to z-scores

| **ID** | **Description** |
| --- | --- |
| GO:0050840 | extracellular matrix binding |
| GO:0001968 | fibronectin binding |
| GO:0019838 | growth factor binding |
| GO:0008083 | growth factor activity |
| GO:0005125 | cytokine activity |
| GO:0043325 | phosphatidylinositol-3,4-bisphosphate binding |
| GO:0045028 | G protein-coupled purinergic nucleotide receptor activity |
| GO:0005161 | platelet-derived growth factor receptor binding |
| GO:0008191 | metalloendopeptidase inhibitor activity |
| GO:0071813 | lipoprotein particle binding |

**Notes:** z-scores, standardized scores that indicate the deviation of a data point from the mean of a distribution.

**Table S4.** The top 10 KEGG pathways according to z-scores

| **ID** | **Description** |
| --- | --- |
| hsa04010 | MAPK signaling pathway |
| hsa05202 | Transcriptional misregulation in cancer |
| hsa05144 | Malaria |
| hsa04820 | Cytoskeleton in muscle cells |
| hsa05205 | Proteoglycans in cancer |
| hsa05323 | Rheumatoid arthritis |
| hsa04518 | Integrin signaling |
| hsa05167 | Kaposi sarcoma–associated herpesvirus infection |
| hsa04979 | Cholesterol metabolism |
| hsa03320 | PPAR signaling pathway |

**Notes:** z-scores, standardized scores that indicate the deviation of a data point from the mean of a distribution.

**Table S5.** Concordance of causal estimates across five Mendelian Randomization methods.

| **Gene** | **Outcome** | **MR method** | **OR** | **p-value** | **or_lci95** | **or_uci95** |
| --- | --- | --- | --- | --- | --- | --- |
| BCL7A | COPD | MR Egger | 0.872157743 | 0.384366816 | 0.662655226 | 1.147895767 |
| BCL7A | COPD | Weighted median | 0.844557749 | 0.004143389 | 0.752438008 | 0.947955557 |
| BCL7A | COPD | Inverse variance weighted | 0.852658632 | 0.00615688 | 0.760753915 | 0.955666121 |
| BCL7A | COPD | Simple mode | 0.856752681 | 0.192025222 | 0.700746598 | 1.047490147 |
| BCL7A | COPD | Weighted mode | 0.841066098 | 0.042386146 | 0.742027551 | 0.953323338 |
| C2orf40 | COPD | MR Egger | 1.020047059 | 0.719126129 | 0.917005813 | 1.134666747 |
| C2orf40 | COPD | Weighted median | 1.024430074 | 0.532743253 | 0.949615489 | 1.105138859 |
| C2orf40 | COPD | Inverse variance weighted | 1.07735707 | 0.015278156 | 1.014408281 | 1.144212127 |
| C2orf40 | COPD | Simple mode | 1.109377489 | 0.23493313 | 0.939832159 | 1.309508725 |
| C2orf40 | COPD | Weighted mode | 1.034203328 | 0.414701399 | 0.955599531 | 1.119272759 |
| CD79B | COPD | MR Egger | 0.775913879 | 0.271030103 | 0.536219547 | 1.122753454 |
| CD79B | COPD | Weighted median | 0.848101052 | 0.052506363 | 0.717990552 | 1.001789499 |
| CD79B | COPD | Inverse variance weighted | 0.841825662 | 0.016751996 | 0.731058395 | 0.969375977 |
| CD79B | COPD | Simple mode | 0.830160201 | 0.181827347 | 0.662207351 | 1.040710222 |
| CD79B | COPD | Weighted mode | 0.841100744 | 0.162626013 | 0.689699398 | 1.025737391 |
| DAPK2 | COPD | MR Egger | 1.19548648 | 0.129153001 | 0.969533256 | 1.474098918 |
| DAPK2 | COPD | Weighted median | 1.1776164 | 0.004597284 | 1.051712468 | 1.318592702 |
| DAPK2 | COPD | Inverse variance weighted | 1.147813771 | 0.001484182 | 1.05424977 | 1.249681518 |
| DAPK2 | COPD | Simple mode | 1.127528158 | 0.228303911 | 0.938678933 | 1.354371238 |
| DAPK2 | COPD | Weighted mode | 1.15455813 | 0.035100147 | 1.02847113 | 1.296102961 |
| DSE | COPD | MR Egger | 1.022056839 | 0.304019983 | 0.980717137 | 1.065139115 |
| DSE | COPD | Weighted median | 1.039379257 | 0.039502199 | 1.001857326 | 1.078306473 |
| DSE | COPD | Inverse variance weighted | 1.043414372 | 0.000237432 | 1.020033371 | 1.067331307 |
| DSE | COPD | Simple mode | 1.011480494 | 0.751997137 | 0.942608665 | 1.085384454 |
| DSE | COPD | Weighted mode | 1.045593884 | 0.044987239 | 1.001789669 | 1.09131348 |
| ECE1 | COPD | MR Egger | 1.027721209 | 0.448329596 | 0.958649258 | 1.101769886 |
| ECE1 | COPD | Weighted median | 1.054675217 | 0.098446623 | 0.990140645 | 1.12341597 |
| ECE1 | COPD | Inverse variance weighted | 1.041989225 | 0.065135426 | 0.997423633 | 1.088546038 |
| ECE1 | COPD | Simple mode | 1.065366976 | 0.288490018 | 0.950077245 | 1.194646855 |
| ECE1 | COPD | Weighted mode | 1.045417878 | 0.182692973 | 0.981010552 | 1.114053807 |
| ERAP2 | COPD | MR Egger | 0.976900799 | 0.008286513 | 0.960440032 | 0.993643684 |
| ERAP2 | COPD | Weighted median | 0.980773616 | 0.030091311 | 0.963717096 | 0.998132013 |
| ERAP2 | COPD | Inverse variance weighted | 0.977355838 | 9.90E-05 | 0.966150438 | 0.988691198 |
| ERAP2 | COPD | Simple mode | 0.980485738 | 0.282914058 | 0.946029893 | 1.016196517 |
| ERAP2 | COPD | Weighted mode | 0.980485738 | 0.018453228 | 0.964808728 | 0.996417481 |
| HSD3B7 | COPD | MR Egger | 0.973197851 | 0.83838339 | 0.752747733 | 1.258209113 |
| HSD3B7 | COPD | Weighted median | 0.857316406 | 0.010890613 | 0.761508338 | 0.965178427 |
| HSD3B7 | COPD | Inverse variance weighted | 0.836099783 | 0.001357549 | 0.749365409 | 0.932873119 |
| HSD3B7 | COPD | Simple mode | 0.861400057 | 0.135463255 | 0.714786087 | 1.038086878 |
| HSD3B7 | COPD | Weighted mode | 0.855254819 | 0.068134474 | 0.73075067 | 1.00097179 |
| LMNA | COPD | MR Egger | 0.926439384 | 0.299928967 | 0.810424193 | 1.059062574 |
| LMNA | COPD | Weighted median | 0.910290879 | 0.039686926 | 0.832310063 | 0.995577875 |
| LMNA | COPD | Inverse variance weighted | 0.914957738 | 0.035856775 | 0.842074284 | 0.994149421 |
| LMNA | COPD | Simple mode | 0.859074876 | 0.0923664 | 0.735150176 | 1.003889637 |
| LMNA | COPD | Weighted mode | 0.928760154 | 0.139022502 | 0.850379464 | 1.014365304 |
| LYZ | COPD | MR Egger | 1.013215773 | 0.34315349 | 0.986217482 | 1.040953157 |
| LYZ | COPD | Weighted median | 1.0144964 | 0.306280249 | 0.986905641 | 1.04285851 |
| LYZ | COPD | Inverse variance weighted | 1.020097552 | 0.022309392 | 1.002834616 | 1.037657654 |
| LYZ | COPD | Simple mode | 1.000333896 | 0.990546435 | 0.946727831 | 1.056975269 |
| LYZ | COPD | Weighted mode | 1.015491574 | 0.382990944 | 0.981176205 | 1.051007079 |
| PADI4 | COPD | MR Egger | 1.017593486 | 0.571665602 | 0.958571934 | 1.080249134 |
| PADI4 | COPD | Weighted median | 1.04619127 | 0.086540191 | 0.993538092 | 1.101634836 |
| PADI4 | COPD | Inverse variance weighted | 1.044111098 | 0.018745831 | 1.007197864 | 1.082377182 |
| PADI4 | COPD | Simple mode | 1.04192415 | 0.360548787 | 0.955401972 | 1.136281865 |
| PADI4 | COPD | Weighted mode | 1.025247839 | 0.358572696 | 0.972894017 | 1.080418949 |
| SFRP2 | COPD | MR Egger | 0.747453882 | 0.059645996 | 0.576232213 | 0.969552365 |
| SFRP2 | COPD | Weighted median | 0.826772912 | 0.003480246 | 0.727724785 | 0.939302142 |
| SFRP2 | COPD | Inverse variance weighted | 0.858781596 | 0.011985159 | 0.762616753 | 0.967072684 |
| SFRP2 | COPD | Simple mode | 0.775375568 | 0.045184298 | 0.625650869 | 0.960930929 |
| SFRP2 | COPD | Weighted mode | 0.835417274 | 0.031821313 | 0.727092415 | 0.959880762 |
| SLC29A1 | COPD | MR Egger | 1.197113839 | 0.361250888 | 0.837816267 | 1.710496204 |
| SLC29A1 | COPD | Weighted median | 1.220168762 | 0.018422248 | 1.034086106 | 1.439736788 |
| SLC29A1 | COPD | Inverse variance weighted | 1.181319449 | 0.010266931 | 1.040173729 | 1.341617849 |
| SLC29A1 | COPD | Simple mode | 1.219706922 | 0.197080248 | 0.928210794 | 1.60274475 |
| SLC29A1 | COPD | Weighted mode | 1.222753596 | 0.083495522 | 1.005702182 | 1.486649213 |
| SPINT2 | COPD | MR Egger | 0.977671714 | 0.613188201 | 0.896697944 | 1.065957591 |
| SPINT2 | COPD | Weighted median | 0.930105734 | 0.075935668 | 0.858579341 | 1.007590836 |
| SPINT2 | COPD | Inverse variance weighted | 0.925602332 | 0.002519161 | 0.880321101 | 0.973212702 |
| SPINT2 | COPD | Simple mode | 0.927935631 | 0.328247625 | 0.800980049 | 1.075013711 |
| SPINT2 | COPD | Weighted mode | 0.92312621 | 0.053600089 | 0.854248302 | 0.997557734 |
| STAB1 | COPD | MR Egger | 0.960100663 | 0.286331762 | 0.894102678 | 1.030970276 |
| STAB1 | COPD | Weighted median | 0.945878604 | 0.076404784 | 0.889418453 | 1.005922837 |
| STAB1 | COPD | Inverse variance weighted | 0.927901716 | 0.002583766 | 0.883820426 | 0.974181597 |
| STAB1 | COPD | Simple mode | 0.966126807 | 0.521560759 | 0.872182577 | 1.070189926 |
| STAB1 | COPD | Weighted mode | 0.950131718 | 0.157861656 | 0.888946147 | 1.015528652 |
| TUBB2A | COPD | MR Egger | 1.022653802 | 0.252144677 | 0.984828374 | 1.061932034 |
| TUBB2A | COPD | Weighted median | 1.019181377 | 0.187332833 | 0.99079873 | 1.04837708 |
| TUBB2A | COPD | Inverse variance weighted | 1.021077624 | 0.039909398 | 1.000961681 | 1.04159783 |
| TUBB2A | COPD | Simple mode | 1.017435048 | 0.442834445 | 0.973983971 | 1.062824551 |
| TUBB2A | COPD | Weighted mode | 1.016106456 | 0.283361463 | 0.987315785 | 1.045736679 |
| ARID5A | OP | MR Egger | 0.080749051 | 0.725985356 | 0.521168398 | 1.011294505 |
| ARID5A | OP | Weighted median | 0.006253417 | 0.774624286 | 0.64503934 | 0.930242153 |
| ARID5A | OP | Inverse variance weighted | 0.007961698 | 0.8031613 | 0.683110013 | 0.94431067 |
| ARID5A | OP | Simple mode | 0.095158284 | 0.79224816 | 0.613896036 | 1.02241603 |
| ARID5A | OP | Weighted mode | 0.023332552 | 0.779031128 | 0.642753417 | 0.944202679 |
| CBR3 | OP | MR Egger | 0.088322725 | 0.930454462 | 0.857941547 | 1.009096143 |
| CBR3 | OP | Weighted median | 0.091878065 | 0.939258733 | 0.873252159 | 1.010254551 |
| CBR3 | OP | Inverse variance weighted | 0.007640787 | 0.933874205 | 0.888091108 | 0.982017524 |
| CBR3 | OP | Simple mode | 0.24703138 | 0.917983979 | 0.795594671 | 1.059200893 |
| CBR3 | OP | Weighted mode | 0.073926044 | 0.940422697 | 0.880475505 | 1.004451396 |
| CDA | OP | MR Egger | 0.167465033 | 0.948016421 | 0.879763694 | 1.021564246 |
| CDA | OP | Weighted median | 0.224659877 | 0.958713133 | 0.895634248 | 1.026234619 |
| CDA | OP | Inverse variance weighted | 0.019501286 | 0.944111407 | 0.899632202 | 0.990789733 |
| CDA | OP | Simple mode | 0.872926662 | 0.990540295 | 0.882137923 | 1.112263798 |
| CDA | OP | Weighted mode | 0.122945956 | 0.954368178 | 0.900245492 | 1.011744716 |
| CHD7 | OP | MR Egger | 0.081294785 | 0.690853921 | 0.469683675 | 1.016171447 |
| CHD7 | OP | Weighted median | 0.141063649 | 0.8484186 | 0.681620835 | 1.056033038 |
| CHD7 | OP | Inverse variance weighted | 0.041106241 | 0.842199647 | 0.714235129 | 0.993090673 |
| CHD7 | OP | Simple mode | 0.216075137 | 0.740103723 | 0.468738019 | 1.168570712 |
| CHD7 | OP | Weighted mode | 0.106219805 | 0.812857927 | 0.641800021 | 1.029507615 |
| EBPL | OP | MR Egger | 0.999024923 | 1.000056261 | 0.91425046 | 1.093915255 |
| EBPL | OP | Weighted median | 0.01210016 | 1.097920181 | 1.020657501 | 1.181031563 |
| EBPL | OP | Inverse variance weighted | 0.018577269 | 1.065538492 | 1.010679525 | 1.123375164 |
| EBPL | OP | Simple mode | 0.909566322 | 1.008792889 | 0.868104659 | 1.172281569 |
| EBPL | OP | Weighted mode | 0.078957837 | 1.059249787 | 0.99484503 | 1.127824009 |
| ECE1 | OP | MR Egger | 0.478189942 | 0.948535489 | 0.821623415 | 1.095051039 |
| ECE1 | OP | Weighted median | 0.059061919 | 0.891961899 | 0.79212135 | 1.004386548 |
| ECE1 | OP | Inverse variance weighted | 0.031564322 | 0.901527717 | 0.820227946 | 0.990885801 |
| ECE1 | OP | Simple mode | 0.274373342 | 0.886146774 | 0.717013588 | 1.095176045 |
| ECE1 | OP | Weighted mode | 0.153059341 | 0.917009668 | 0.81732574 | 1.028851399 |
| EMP1 | OP | MR Egger | 0.112265329 | 1.782042255 | 1.020007028 | 3.113385018 |
| EMP1 | OP | Weighted median | 0.067593921 | 1.361046341 | 0.97793461 | 1.894244385 |
| EMP1 | OP | Inverse variance weighted | 0.031456679 | 1.338729076 | 1.02627339 | 1.746313953 |
| EMP1 | OP | Simple mode | 0.51779374 | 1.195962561 | 0.722217221 | 1.980465718 |
| EMP1 | OP | Weighted mode | 0.066357874 | 1.491769858 | 1.067148328 | 2.085349573 |
| F13A1 | OP | MR Egger | 0.09664948 | 0.870758443 | 0.742580963 | 1.021060738 |
| F13A1 | OP | Weighted median | 0.042783082 | 0.874248269 | 0.767654714 | 0.995642991 |
| F13A1 | OP | Inverse variance weighted | 0.000545883 | 0.864143022 | 0.795487964 | 0.938723395 |
| F13A1 | OP | Simple mode | 0.258476234 | 0.87405292 | 0.694407461 | 1.100173242 |
| F13A1 | OP | Weighted mode | 0.083802999 | 0.892620683 | 0.787360981 | 1.01195221 |
| FAM129B | OP | MR Egger | 0.642143281 | 1.152422349 | 0.646308576 | 2.054865617 |
| FAM129B | OP | Weighted median | 0.006286703 | 1.413922172 | 1.102869595 | 1.812703802 |
| FAM129B | OP | Inverse variance weighted | 0.012355132 | 1.303960052 | 1.059164423 | 1.605333205 |
| FAM129B | OP | Simple mode | 0.124770697 | 1.48385439 | 0.935188785 | 2.354416443 |
| FAM129B | OP | Weighted mode | 0.069427884 | 1.51325509 | 1.015033785 | 2.25602438 |
| HES4 | OP | MR Egger | 0.936594498 | 0.993898026 | 0.857066576 | 1.15257474 |
| HES4 | OP | Weighted median | 0.246250677 | 0.937498685 | 0.840602184 | 1.045564479 |
| HES4 | OP | Inverse variance weighted | 0.039990132 | 0.917149745 | 0.844494438 | 0.996055884 |
| HES4 | OP | Simple mode | 0.893897435 | 0.989209558 | 0.845691505 | 1.157083339 |
| HES4 | OP | Weighted mode | 0.383720201 | 0.947158394 | 0.841246817 | 1.066404064 |
| HNMT | OP | MR Egger | 0.498415558 | 0.912365898 | 0.702546736 | 1.18484862 |
| HNMT | OP | Weighted median | 0.043898011 | 0.834245 | 0.699419836 | 0.995060025 |
| HNMT | OP | Inverse variance weighted | 0.000795087 | 0.801902074 | 0.704856006 | 0.912309649 |
| HNMT | OP | Simple mode | 0.288345897 | 0.841772431 | 0.61682836 | 1.148748779 |
| HNMT | OP | Weighted mode | 0.103453434 | 0.847958619 | 0.70055045 | 1.026384066 |
| IER3 | OP | MR Egger | 0.125538598 | 1.145012774 | 0.967866618 | 1.354581539 |
| IER3 | OP | Weighted median | 0.023361652 | 1.143866137 | 1.018393598 | 1.284797688 |
| IER3 | OP | Inverse variance weighted | 0.003592838 | 1.132247477 | 1.041436821 | 1.230976594 |
| IER3 | OP | Simple mode | 0.609526277 | 1.052041379 | 0.867758207 | 1.275460207 |
| IER3 | OP | Weighted mode | 0.02521335 | 1.153597582 | 1.024517084 | 1.298941131 |
| INSR | OP | MR Egger | 0.990637349 | 0.993824349 | 0.371302318 | 2.660061057 |
| INSR | OP | Weighted median | 0.11855258 | 0.734975439 | 0.499287995 | 1.081918453 |
| INSR | OP | Inverse variance weighted | 0.032045559 | 0.724728209 | 0.539934149 | 0.972768583 |
| INSR | OP | Simple mode | 0.550342057 | 0.81399259 | 0.43021217 | 1.540132945 |
| INSR | OP | Weighted mode | 0.572526131 | 0.835243215 | 0.462364181 | 1.508834933 |
| KDM6B | OP | MR Egger | 0.1807037 | 0.692644192 | 0.444078095 | 1.080341458 |
| KDM6B | OP | Weighted median | 0.011494799 | 0.676903452 | 0.500142971 | 0.916134606 |
| KDM6B | OP | Inverse variance weighted | 0.001983511 | 0.674091102 | 0.525011214 | 0.865503061 |
| KDM6B | OP | Simple mode | 0.108829595 | 0.676855989 | 0.457112612 | 1.0022345 |
| KDM6B | OP | Weighted mode | 0.056939842 | 0.678846137 | 0.498838026 | 0.923811045 |
| LILRB4 | OP | MR Egger | 0.766471987 | 0.970740178 | 0.800204808 | 1.177619134 |
| LILRB4 | OP | Weighted median | 0.732163113 | 0.971848549 | 0.825235695 | 1.144508906 |
| LILRB4 | OP | Inverse variance weighted | 0.03609122 | 0.88503441 | 0.789513246 | 0.992112432 |
| LILRB4 | OP | Simple mode | 0.65127904 | 0.929198307 | 0.679025843 | 1.271541432 |
| LILRB4 | OP | Weighted mode | 0.41216835 | 0.929198307 | 0.782490457 | 1.103412169 |
| MAFB | OP | MR Egger | 0.287473236 | 0.786975368 | 0.517051592 | 1.197811281 |
| MAFB | OP | Weighted median | 0.048436381 | 0.771670946 | 0.596534342 | 0.998225931 |
| MAFB | OP | Inverse variance weighted | 0.006609019 | 0.768764302 | 0.635877951 | 0.929421364 |
| MAFB | OP | Simple mode | 0.486325654 | 0.849354976 | 0.543996754 | 1.326117979 |
| MAFB | OP | Weighted mode | 0.121367418 | 0.782799265 | 0.586965988 | 1.043969671 |
| PADI4 | OP | MR Egger | 0.039243728 | 1.180783628 | 1.015707181 | 1.372688904 |
| PADI4 | OP | Weighted median | 0.227314777 | 1.082876597 | 0.95157213 | 1.232299357 |
| PADI4 | OP | Inverse variance weighted | 0.003999529 | 1.129364639 | 1.039573227 | 1.226911635 |
| PADI4 | OP | Simple mode | 0.009368568 | 1.325771502 | 1.086997378 | 1.616995691 |
| PADI4 | OP | Weighted mode | 0.177138166 | 1.097460294 | 0.961968373 | 1.252036065 |
| PID1 | OP | MR Egger | 0.012962639 | 1.198181396 | 1.049148201 | 1.368384997 |
| PID1 | OP | Weighted median | 0.026627741 | 1.129380029 | 1.014200731 | 1.257639845 |
| PID1 | OP | Inverse variance weighted | 0.006400212 | 1.115375368 | 1.031174033 | 1.20645223 |
| PID1 | OP | Simple mode | 0.093605106 | 1.141177733 | 0.983273068 | 1.324440443 |
| PID1 | OP | Weighted mode | 0.012478624 | 1.146171246 | 1.037215556 | 1.266572332 |
| RAB3IP | OP | MR Egger | 0.863770201 | 0.986658797 | 0.847359633 | 1.148857632 |
| RAB3IP | OP | Weighted median | 0.167373394 | 1.096800377 | 0.96197411 | 1.250523328 |
| RAB3IP | OP | Inverse variance weighted | 0.018234593 | 1.114067153 | 1.018508382 | 1.218591466 |
| RAB3IP | OP | Simple mode | 0.011243451 | 1.387833912 | 1.092584891 | 1.762868023 |
| RAB3IP | OP | Weighted mode | 0.263035177 | 1.070849006 | 0.9518255 | 1.204756117 |
| RHOB | OP | MR Egger | 0.13623599 | 2.159880311 | 1.024342462 | 4.554221982 |
| RHOB | OP | Weighted median | 0.078205079 | 1.432478135 | 0.960242359 | 2.136953854 |
| RHOB | OP | Inverse variance weighted | 0.010624994 | 1.536893584 | 1.105232333 | 2.137145123 |
| RHOB | OP | Simple mode | 0.323953069 | 1.402810567 | 0.777385941 | 2.531403493 |
| RHOB | OP | Weighted mode | 0.199058711 | 1.421194558 | 0.907848967 | 2.224812768 |
| SRA1 | OP | MR Egger | 0.503819347 | 0.952390694 | 0.8269425 | 1.096869535 |
| SRA1 | OP | Weighted median | 0.084255425 | 0.893814476 | 0.786867494 | 1.015297142 |
| SRA1 | OP | Inverse variance weighted | 0.003942767 | 0.887324877 | 0.818056265 | 0.962458784 |
| SRA1 | OP | Simple mode | 0.379555005 | 0.905030398 | 0.72681853 | 1.126938826 |
| SRA1 | OP | Weighted mode | 0.112617194 | 0.905030398 | 0.802960815 | 1.020074711 |
| TUBB2A | OP | MR Egger | 0.360928405 | 1.039193888 | 0.957986461 | 1.127285176 |
| TUBB2A | OP | Weighted median | 0.000306516 | 1.119615689 | 1.052993417 | 1.190453111 |
| TUBB2A | OP | Inverse variance weighted | 0.001473253 | 1.070817839 | 1.02659644 | 1.116944107 |
| TUBB2A | OP | Simple mode | 0.029635874 | 1.127189311 | 1.016372559 | 1.250088593 |
| TUBB2A | OP | Weighted mode | 0.001185939 | 1.12179783 | 1.052446022 | 1.195719633 |
| VDR | OP | MR Egger | 0.344465053 | 0.820447177 | 0.549913477 | 1.224071781 |
| VDR | OP | Weighted median | 0.053419129 | 0.843291647 | 0.709355662 | 1.002516566 |
| VDR | OP | Inverse variance weighted | 0.016407414 | 0.839541362 | 0.727784312 | 0.968459593 |
| VDR | OP | Simple mode | 0.302960918 | 0.863135684 | 0.657034787 | 1.133887008 |
| VDR | OP | Weighted mode | 0.161863206 | 0.857814359 | 0.697455293 | 1.055043214 |

**Table S6.** Heterogeneity test

| **Gene** | **Outcome** | **method** | **Q** | **Q_df** | **Q_pval** |
| --- | --- | --- | --- | --- | --- |
| BCL7A | COPD | MR Egger | 6.13685766 | 4 | 0.189158131 |
| BCL7A | COPD | Inverse variance weighted | 6.187634998 | 5 | 0.288387065 |
| C2orf40 | COPD | MR Egger | 17.87480952 | 17 | 0.396779711 |
| C2orf40 | COPD | Inverse variance weighted | 20.46329101 | 18 | 0.307349406 |
| CD79B | COPD | MR Egger | 0.44387157 | 3 | 0.93103773 |
| CD79B | COPD | Inverse variance weighted | 0.662833985 | 4 | 0.955831908 |
| DAPK2 | COPD | MR Egger | 2.598561211 | 3 | 0.457741841 |
| DAPK2 | COPD | Inverse variance weighted | 2.656467063 | 4 | 0.616853519 |
| DSE | COPD | MR Egger | 63.01292945 | 67 | 0.615463628 |
| DSE | COPD | Inverse variance weighted | 64.40559468 | 68 | 0.601163936 |
| ECE1 | COPD | MR Egger | 16.43809498 | 20 | 0.68910076 |
| ECE1 | COPD | Inverse variance weighted | 17.97145647 | 21 | 0.650809824 |
| ERAP2 | COPD | MR Egger | 108.8308086 | 96 | 0.174817487 |
| ERAP2 | COPD | Inverse variance weighted | 108.836853 | 97 | 0.193531209 |
| HSD3B7 | COPD | MR Egger | 24.89313249 | 16 | 0.071731715 |
| HSD3B7 | COPD | Inverse variance weighted | 27.42580083 | 17 | 0.052111265 |
| LMNA | COPD | MR Egger | 11.79758008 | 7 | 0.107415153 |
| LMNA | COPD | Inverse variance weighted | 11.89736274 | 8 | 0.155842392 |
| LYZ | COPD | MR Egger | 80.03442698 | 81 | 0.509456044 |
| LYZ | COPD | Inverse variance weighted | 80.53740702 | 82 | 0.525009158 |
| PADI4 | COPD | MR Egger | 28.63250121 | 28 | 0.431340181 |
| PADI4 | COPD | Inverse variance weighted | 29.8288828 | 29 | 0.422582673 |
| SFRP2 | COPD | MR Egger | 11.457681 | 8 | 0.177089865 |
| SFRP2 | COPD | Inverse variance weighted | 13.41691654 | 9 | 0.144630693 |
| SLC29A1 | COPD | MR Egger | 5.30599062 | 6 | 0.505208214 |
| SLC29A1 | COPD | Inverse variance weighted | 5.312086554 | 7 | 0.621935595 |
| SPINT2 | COPD | MR Egger | 16.05605446 | 24 | 0.886042083 |
| SPINT2 | COPD | Inverse variance weighted | 18.38526307 | 25 | 0.825605341 |
| STAB1 | COPD | MR Egger | 10.09876528 | 11 | 0.521525662 |
| STAB1 | COPD | Inverse variance weighted | 11.75259925 | 12 | 0.465747798 |
| TUBB2A | COPD | MR Egger | 22.43547164 | 34 | 0.935689507 |
| TUBB2A | COPD | Inverse variance weighted | 22.4443924 | 35 | 0.950342189 |
| ARID5A | OP | MR Egger | 18.63378706 | 13 | 0.134903154 |
| ARID5A | OP | Inverse variance weighted | 19.31392544 | 14 | 0.15329738 |
| CBR3 | OP | MR Egger | 46.64322104 | 46 | 0.445813334 |
| CBR3 | OP | Inverse variance weighted | 46.65625876 | 47 | 0.486705227 |
| CDA | OP | MR Egger | 46.21305661 | 46 | 0.463457125 |
| CDA | OP | Inverse variance weighted | 46.31691901 | 47 | 0.500751999 |
| CHD7 | OP | MR Egger | 15.31438119 | 14 | 0.357007297 |
| CHD7 | OP | Inverse variance weighted | 16.66428918 | 15 | 0.339326019 |
| EBPL | OP | MR Egger | 53.96841152 | 42 | 0.101986717 |
| EBPL | OP | Inverse variance weighted | 57.6652993 | 43 | 0.066709486 |
| ECE1 | OP | MR Egger | 25.97629155 | 19 | 0.130850989 |
| ECE1 | OP | Inverse variance weighted | 27.49926901 | 20 | 0.121792679 |
| EMP1 | OP | MR Egger | 0.706153724 | 4 | 0.950567879 |
| EMP1 | OP | Inverse variance weighted | 2.012169301 | 5 | 0.847458632 |
| F13A1 | OP | MR Egger | 31.06204755 | 38 | 0.780060503 |
| F13A1 | OP | Inverse variance weighted | 31.07412348 | 39 | 0.813186932 |
| FAM129B | OP | MR Egger | 16.32434268 | 9 | 0.06040971 |
| FAM129B | OP | Inverse variance weighted | 16.69422693 | 10 | 0.081409752 |
| HES4 | OP | MR Egger | 15.20163394 | 14 | 0.364511643 |
| HES4 | OP | Inverse variance weighted | 16.95160499 | 15 | 0.321765693 |
| HNMT | OP | MR Egger | 24.87675315 | 23 | 0.356671181 |
| HNMT | OP | Inverse variance weighted | 26.2123326 | 24 | 0.342479675 |
| IER3 | OP | MR Egger | 34.25752891 | 27 | 0.1586881 |
| IER3 | OP | Inverse variance weighted | 34.30860886 | 28 | 0.190896477 |
| INSR | OP | MR Egger | 4.251319726 | 5 | 0.513828215 |
| INSR | OP | Inverse variance weighted | 4.685261058 | 6 | 0.584766514 |
| KDM6B | OP | MR Egger | 1.539369635 | 4 | 0.819645495 |
| KDM6B | OP | Inverse variance weighted | 1.56032833 | 5 | 0.9060047 |
| LILRB4 | OP | MR Egger | 14.98927066 | 19 | 0.723279017 |
| LILRB4 | OP | Inverse variance weighted | 16.34112732 | 20 | 0.695248531 |
| MAFB | OP | MR Egger | 7.1692367 | 11 | 0.785217394 |
| MAFB | OP | Inverse variance weighted | 7.18423178 | 12 | 0.845202352 |
| PADI4 | OP | MR Egger | 27.26184339 | 27 | 0.449738037 |
| PADI4 | OP | Inverse variance weighted | 28.1881588 | 28 | 0.454510565 |
| PID1 | OP | MR Egger | 18.50402974 | 26 | 0.856673456 |
| PID1 | OP | Inverse variance weighted | 20.21996772 | 27 | 0.821399365 |
| RAB3IP | OP | MR Egger | 27.62018559 | 21 | 0.151255645 |
| RAB3IP | OP | Inverse variance weighted | 29.69218971 | 22 | 0.126139715 |
| RHOB | OP | MR Egger | 2.039099803 | 3 | 0.564331182 |
| RHOB | OP | Inverse variance weighted | 3.03247661 | 4 | 0.552405304 |
| SRA1 | OP | MR Egger | 24.63153929 | 29 | 0.697218391 |
| SRA1 | OP | Inverse variance weighted | 26.07334552 | 30 | 0.671382505 |
| TUBB2A | OP | MR Egger | 32.67989917 | 34 | 0.532273599 |
| TUBB2A | OP | Inverse variance weighted | 33.39288252 | 35 | 0.54578254 |
| VDR | OP | MR Egger | 24.80900325 | 19 | 0.166925643 |
| VDR | OP | Inverse variance weighted | 24.82815785 | 20 | 0.208084591 |

**Table S7.** Horizontal pleiotropy test

| **Gene** | **Outcome** | **egger_intercept** | **se** | **pval** |
| --- | --- | --- | --- | --- |
| BCL7A | COPD | -0.003101541 | 0.017048476 | 0.864489087 |
| C2orf40 | COPD | 0.010909342 | 0.006953001 | 0.135069859 |
| CD79B | COPD | 0.007421753 | 0.015860677 | 0.671728567 |
| DAPK2 | COPD | -0.007950106 | 0.033037841 | 0.825344395 |
| ECE1 | COPD | 0.005248176 | 0.004447183 | 0.242128524 |
| DSE | COPD | 0.00714353 | 0.005768868 | 0.229947285 |
| ERAP2 | COPD | 0.00023691 | 0.003244517 | 0.941943132 |
| HSD3B7 | COPD | -0.017613026 | 0.013804625 | 0.220210392 |
| LMNA | COPD | -0.00270557 | 0.01111933 | 0.814733114 |
| LYZ | COPD | 0.00265123 | 0.003738282 | 0.480230064 |
| PADI4 | COPD | 0.006254017 | 0.005781957 | 0.288638926 |
| SFRP2 | COPD | 0.015851929 | 0.01355321 | 0.275823362 |
| SLC29A1 | COPD | -0.001180579 | 0.015120808 | 0.9403059 |
| SPINT2 | COPD | -0.009747082 | 0.006386611 | 0.140038251 |
| STAB1 | COPD | -0.011201283 | 0.008710073 | 0.22484859 |
| TUBB2A | COPD | -0.000707528 | 0.007491048 | 0.925306304 |
| ARID5A | OP | 0.018171256 | 0.026379417 | 0.503031666 |
| CBR3 | OP | 0.001111293 | 0.009800385 | 0.91021262 |
| CDA | OP | -0.003250632 | 0.010109789 | 0.749262913 |
| CHD7 | OP | 0.030354483 | 0.027324767 | 0.285335893 |
| EBPL | OP | 0.019935094 | 0.011752908 | 0.0972523 |
| ECE1 | OP | -0.014881969 | 0.014100205 | 0.304459226 |
| EMP1 | OP | -0.035224544 | 0.030822737 | 0.31687215 |
| F13A1 | OP | -0.00131689 | 0.011983648 | 0.913074488 |
| FAM129B | OP | 0.019004222 | 0.042083687 | 0.662255746 |
| HES4 | OP | -0.024864839 | 0.019586252 | 0.224958963 |
| HNMT | OP | -0.019047359 | 0.017140869 | 0.277953354 |
| IER3 | OP | -0.003200478 | 0.015950922 | 0.842479659 |
| INSR | OP | -0.026639905 | 0.04044056 | 0.539182725 |
| KDM6B | OP | -0.00413341 | 0.028551331 | 0.891893115 |
| LILRB4 | OP | -0.015885864 | 0.013662983 | 0.259349921 |
| MAFB | OP | -0.003233562 | 0.026406258 | 0.904747737 |
| PADI4 | OP | -0.013305882 | 0.013891845 | 0.346652459 |
| PID1 | OP | -0.01599379 | 0.012209576 | 0.201673201 |
| RAB3IP | OP | 0.021869997 | 0.01742437 | 0.223216759 |
| RHOB | OP | -0.035280134 | 0.035397551 | 0.392376104 |
| SRA1 | OP | -0.016853505 | 0.014035788 | 0.239563566 |
| TUBB2A | OP | 0.01409029 | 0.016687075 | 0.404357588 |
| VDR | OP | 0.002910057 | 0.024026625 | 0.904869306 |
